# Supplementary material for: An insight into the intermolecular vibrational modes of dicationic ionic liquids through far-infrared spectroscopy and DFT calculations
Source: Royal Society of Chemistry journal article supplement (doi:10.1039/c9ra05735h), 2019-01-01
Supplement: c9ra05735h1.pdf [file c9ra05735h1.pdf]

## **An insight into the intermolecular vibrational modes of dicationic ionic liquids through far-infrared spectroscopy, and DFT calculations**

Luca Guglielmero, Lorenzo Guazzelli, Alessandra Toncelli, Cinzia Chiappe, Alessandro Tredicucci and Christian Silvio Pomelli\*

### ***Supporting Information***

#### ***Table of contents***

|                                                        |                |
|--------------------------------------------------------|----------------|
| <b>Analysis with different basis sets/functionals.</b> | <b>S2</b>      |
| <b>Optimized geometries:</b>                           |                |
| <b>BIC4IB+2Br Syn</b>                                  | <b>S3-S4</b>   |
| <b>BIC4IB+2Br Anti</b>                                 | <b>S5-S6</b>   |
| <b>BIC5IB+2Br Syn</b>                                  | <b>S7-S9</b>   |
| <b>BIC5IB+2Br Anti</b>                                 | <b>S10-S12</b> |
| <b>MIC6IM+2Tf2N Syn</b>                                | <b>S13-S15</b> |
| <b>MIC6IM+2Tf2N Anti</b>                               | <b>S17-S18</b> |
| <b>Frequencies and Intensities</b>                     | <b>S19-S22</b> |

| Method                           | B3LYP/aug-cc-pvtz-pp | m062x/lanl08(d) | mPW2PLYPD/crenbl |
|----------------------------------|----------------------|-----------------|------------------|
| <b>Number of basis functions</b> | 1858                 | 748             | 544              |
| <b>Progressive number</b>        | 19                   | 19              | 19               |
| <b>Frequency/cm<sup>-1</sup></b> | 138.6                | 149.6           | 159.9            |
| <b>Intensity/ (Kg/mole)</b>      | 24.4                 | 17.5            | 20.9             |
| <b>Red. Mass (a.u.)</b>          | 4.4608               | 4.1478          | 4.7148           |
| <b>Progressive number</b>        | 41                   | 41              | 41               |
| <b>Frequency/cm<sup>-1</sup></b> | 639.8                | 640.3           | 654.8            |
| <b>Intensity/ (Kg/mole)</b>      | 116.4                | 102.2           | 67.8             |
| <b>Red. Mass (a.u.)</b>          | 2.0376               | 2.7505          | 2.7024           |

In the table some data about test calculations on BIC4IB+2Br Syn system with different functionals and basis sets are reported. All geometries have been re-optimized and frequencies calculations have been performed.

Data about two of the normal modes analyzed in the paper are reported. For all the different calculation schemes, they share the same progressive number, e.g. they are the 19<sup>th</sup> and 41<sup>th</sup> normal modes (ordered with respect to increasing frequency values), they present a large IR intensity with respect to normal modes with similar frequency. A visual analysis shows that all the corresponding normal modes are related to the same molecular motion (the one reported in the main paper body). Reduced masses are similar (this is a synthetic index of similarity between normal modes, especially in the case of normal modes extendedly delocalized in the molecule like these ones). Differences in frequencies are observable. Frequencies (especially lower ones) are the normal-mode related quantity most sensitive to the level of calculation. As reported in the table, the method used in the paper presents a considerable larger basis set.

Conclusion: the calculated infrared quantities reported in the paper are reliable and are not the consequence of level of calculation numerical artifact.

## BIC4IB+2Br Syn

Charge = 0 Multiplicity = 1

C,0,1.2397196542,2.3904481814,1.5446644865  
C,0,2.3270026977,1.7996162075,0.9887474312  
C,0,1.0971351718,2.6615591695,-0.6328437797  
N,0,0.4838899854,2.9267548265,0.5183454685  
H,0,0.9430072686,2.4612657842,2.5731912249  
H,0,3.1121498695,1.1889472506,1.4220825896  
H,0,0.7084643328,2.9010440245,-1.6055986496  
C,0,-0.7938156751,3.6468080231,0.638481437  
H,0,-1.1700601383,3.7663790134,-0.3754443143  
H,0,-0.5848402238,4.6323625436,1.0588235677  
C,0,3.1691173146,0.0399429235,-1.6214191221  
H,0,3.1878867131,-0.4592979328,-0.6482969256  
C,0,1.9956739606,-0.4155739695,-2.4947225367  
H,0,1.0946395002,0.1754711024,-2.3110772456  
H,0,2.2406631756,-0.2692915719,-3.5494881234  
C,0,1.6317114618,-1.8911180791,-2.3030905392  
H,0,1.0827709459,-2.2636667186,-3.1658832864  
H,0,2.5153069303,-2.5135203276,-2.1735267672  
N,0,0.7721442299,-2.109589399,-1.1276844824  
C,0,-0.5469239849,-1.8975732389,-1.1292730203  
C,0,1.170290904,-2.4478350695,0.1529068532  
H,0,-1.1253231022,-1.5161323953,-1.9537437373  
C,0,0.0491047009,-2.451589377,0.9169604416  
H,0,2.2063384958,-2.5581650088,0.4458280025  
H,0,-0.0722226727,-2.6409200108,1.9667278011  
C,0,-2.4136963095,-1.9327973305,0.4974290179  
H,0,-2.4088427555,-1.6462341016,1.5484763804

H,0,-2.7964941336,-1.0887815102,-0.0779255094  
N,0,-1.0116833303,-2.1062505216,0.1001400414  
N,0,2.2246335245,1.9943797855,-0.3770808294  
Br,0,4.0309822712,-1.2008325788,1.7612548177  
Br,0,-1.6688059381,1.1231838034,-1.9603432951  
C,0,3.2150836406,1.5441165548,-1.3721063752  
H,0,3.0341478995,2.1169347828,-2.2815653196  
H,0,4.1919970582,1.8258583179,-0.9844078438  
H,0,4.1116407941,-0.2377159254,-2.0984672089  
C,0,-1.8239703437,2.8991265086,1.4765002249  
H,0,-1.9734792991,1.9156152658,1.0285650536  
H,0,-1.4519972751,2.7560494693,2.4947920452  
C,0,-3.1536639125,3.6535355968,1.5210248853  
H,0,-2.9929113853,4.6608122408,1.9176800416  
H,0,-3.5241412873,3.7751007822,0.5003884621  
C,0,-4.2080101341,2.9377557724,2.3627034473  
H,0,-3.8773857523,2.8184976226,3.3965892248  
H,0,-5.1452442071,3.4946194517,2.3766978432  
H,0,-4.4185354163,1.9447543343,1.9623809715  
C,0,-3.2540812392,-3.1891972677,0.2817740267  
H,0,-3.2257205102,-3.4602658264,-0.7768908844  
H,0,-2.8114902189,-4.0237671039,0.8325341409  
C,0,-4.7049006401,-2.9879073354,0.7215893338  
H,0,-5.1328730983,-2.1436769606,0.1746470004  
H,0,-4.7268473771,-2.7103870082,1.7795152696  
C,0,-5.5671671994,-4.2295310884,0.5029365698  
H,0,-6.5937498362,-4.0572552774,0.8266182423  
H,0,-5.594697013,-4.5095435031,-0.5516003356  
H,0,-5.1810571358,-5.0832600832,1.0629558645

## BIC4IB+2Br anti

Charge = 0 Multiplicity = 1

C,0,0.0198797854,-2.6058224486,-0.5471669788  
C,0,0.5515196613,-2.2939046319,0.6609204965  
C,0,2.1491337456,-2.1378394107,-0.8614148725  
N,0,1.0311052112,-2.5045788394,-1.4839951497  
H,0,-0.9873128814,-2.8642525557,-0.8139111978  
H,0,0.0651405021,-2.1785549042,1.6163879289  
H,0,3.0701546781,-1.8662107539,-1.3518945805  
C,0,0.9113501027,-2.654643842,-2.9404528252  
H,0,1.43965828,-1.805766745,-3.3798604841  
H,0,-0.1475580266,-2.5587600884,-3.1768326844  
C,0,2.9627397035,0.0160838168,1.420505217  
H,0,2.9149723823,0.3506004726,0.3809943627  
C,0,1.9089924194,0.7039878291,2.298573332  
H,0,0.9587832388,0.1637296362,2.3018339107  
H,0,2.2494568553,0.7078677584,3.3362940052  
C,0,1.615970234,2.1542945295,1.8984097911  
H,0,1.2110109747,2.7052190771,2.7448460044  
H,0,2.5103488066,2.6745656047,1.5590295157  
N,0,0.61991232,2.2469660276,0.8193594111  
C,0,-0.697459677,2.1522408577,1.0265891395  
C,0,0.8550223177,2.2981486809,-0.5427133026  
H,0,-1.1780338486,1.9721499518,1.9748504064  
C,0,-0.3579597735,2.2499744766,-1.1474923985  
H,0,1.8410938132,2.285633191,-0.9789453815  
H,0,-0.6113243816,2.2479282633,-2.1906500286  
C,0,-2.7624173665,1.9871034615,-0.3262854888

H,0,-2.9142678239,1.6423383406,-1.3482581558  
H,0,-3.0578717541,1.1855838096,0.3541992526  
N,0,-1.3139573655,2.1607107333,-0.1532231955  
N,0,1.8887437161,-2.0147021316,0.4441318713  
Br,0,3.19521819,0.4452825816,-2.5233041897  
Br,0,-1.8821942151,-0.4599074134,2.5433683448  
C,0,2.8698836389,-1.5138742633,1.4196408746  
H,0,2.5872222687,-1.9079291229,2.3946252191  
H,0,3.8292296517,-1.9503422364,1.1492476275  
H,0,3.9602384264,0.288298321,1.7721978455  
C,0,1.4642187268,-3.9820696668,-3.4519489998  
H,0,2.5207796547,-4.0560361132,-3.1819129487  
H,0,0.9511716195,-4.8101377173,-2.9546037266  
C,0,1.3157521134,-4.1120673886,-4.9685021796  
H,0,0.2581981427,-4.0311853661,-5.2368826979  
H,0,1.8198816901,-3.2710298018,-5.4510738899  
C,0,1.8790331387,-5.4253458974,-5.5077715099  
H,0,1.373675559,-6.2854371688,-5.0641942372  
H,0,1.7577410435,-5.4906062934,-6.5891999747  
H,0,2.9441908869,-5.5164201895,-5.2879113966  
C,0,-3.5534349027,3.2650541933,-0.0607997661  
H,0,-3.3642476638,3.5951405847,0.9638758722  
H,0,-3.1980612217,4.0612909428,-0.7210896974  
C,0,-5.0551809095,3.0544950934,-0.2590302811  
H,0,-5.3930383556,2.2470598892,0.3953903784  
H,0,-5.2413698286,2.7179294381,-1.2832607436  
C,0,-5.8712318308,4.3152649654,0.0190323478  
H,0,-6.9358732194,4.1358063083,-0.1319350809  
H,0,-5.7349928378,4.6532601423,1.0478141502

H, 0, -5.5751704251, 5.1328831419, -0.6410832612

### **BIC5IB+2Br Syn**

Charge = 0 Multiplicity = 1

C, 0, 2.4933531917, -0.8433885016, 1.1622250494

C, 0, 2.1880871681, 0.4087509299, 1.5812486511

C, 0, 0.5430087885, -0.9358337644, 2.1851031356

N, 0, 1.4599141314, -1.6708174263, 1.5556281474

H, 0, 3.3234156632, -1.1906191384, 0.5770806049

H, 0, 2.7016414782, 1.331552692, 1.3883025484

H, 0, -0.429464668, -1.2780338292, 2.5082785307

C, 0, 1.3298119017, -3.1004454145, 1.2522147083

H, 0, 0.7171073792, -3.5421569817, 2.0364737729

H, 0, 2.3269240749, -3.5344121292, 1.3255865986

C, 0, 0.3937744272, 2.7809142401, 2.2834772496

H, 0, 1.4460366564, 3.070326381, 2.3034218453

C, 0, -1.6516315826, 2.8118859453, 0.7279747072

H, 0, -2.0276142456, 1.8788368194, 1.1548704246

H, 0, -2.131098564, 3.6271818452, 1.2782489168

C, 0, -2.1379456626, 2.9039141851, -0.7195078081

H, 0, -3.2126464257, 3.0757193405, -0.7514936598

H, 0, -1.6531898674, 3.7229638999, -1.2486635549

N, 0, -1.8805615931, 1.6822151694, -1.4987243552

C, 0, -2.679941492, 0.6124629582, -1.499758729

C, 0, -0.7703007178, 1.4103853366, -2.276572865

H, 0, -3.576175085, 0.4962659568, -0.919467548

C, 0, -0.9395989887, 0.1565576623, -2.7655576253

H, 0, 0.0872122574, 2.0654816492, -2.3500786792

H, 0, -0.2953296246, -0.4341665532, -3.3885151517  
C, 0, -2.7017344052, -1.6631628101, -2.4811166626  
H, 0, -1.8865732018, -2.2887066184, -2.8413726074  
H, 0, -2.9980003648, -2.0283390754, -1.4959697032  
N, 0, -2.1395318362, -0.3232338855, -2.2767223261  
N, 0, 0.9677840069, 0.3294051997, 2.2240110651  
Br, 0, 2.6125351962, 1.9373910432, -1.53922973  
Br, 0, -2.7279647283, -1.1602698338, 1.3108706342  
C, 0, 0.2326258174, 1.4038288954, 2.920037666  
H, 0, -0.8094131204, 1.0872250826, 2.9339650882  
H, 0, 0.5899305403, 1.4326595557, 3.9503629965  
H, 0, -0.119525295, 3.4818906665, 2.9481601553  
C, 0, -0.1328177083, 2.9233645628, 0.8547807917  
H, 0, 0.1856847902, 3.8981253039, 0.4780868254  
H, 0, 0.3736082752, 2.204500119, 0.2079748237  
C, 0, 0.713087381, -3.3631375702, -0.1192411514  
H, 0, -0.2835337386, -2.9161729356, -0.1391205776  
H, 0, 1.3114345853, -2.8626248881, -0.8848943627  
C, 0, 0.6273616604, -4.8606242005, -0.4178326737  
H, 0, 1.627924156, -5.3009957611, -0.3708660542  
H, 0, 0.0383562588, -5.3512443929, 0.3620962801  
C, 0, 0.0067853826, -5.1578779306, -1.781388069  
H, 0, 0.5848833948, -4.7000324326, -2.5864242899  
H, 0, -0.0332421298, -6.2307217239, -1.971183875  
H, 0, -1.0130378602, -4.773788688, -1.8381602137  
C, 0, -3.8681316637, -1.676992167, -3.4662229596  
H, 0, -4.6641529515, -1.0287415557, -3.0902587076  
H, 0, -3.5440959764, -1.2559776183, -4.4220392513  
C, 0, -4.4179251753, -3.0881440685, -3.6789571789



H,0,-4.7261917111,-3.5029942838,-2.7157868043  
H,0,-3.617772357,-3.7354833136,-4.0496137572  
C,0,-5.5940463257,-3.1247563342,-4.6528146833  
H,0,-5.9631968025,-4.1418296865,-4.7858455135  
H,0,-6.4243676943,-2.5156013139,-4.2911396987  
H,0,-5.3067623798,-2.744493413,-5.63491228

## BIC5IB+2Br Anti

Charge = 0 Multiplicity = 1

Redundant internal coordinates found in file. (old form).

C,0,1.1246296833,-1.9299956778,1.5377619845  
C,0,0.2840319223,-1.1539601356,2.2659237555  
C,0,1.7463976241,0.1681077664,1.2717776862  
N,0,2.0260506365,-1.0885287132,0.9188075522  
H,0,1.1441550209,-2.9929785122,1.3881210087  
H,0,-0.5996091157,-1.3935388391,2.8290260141  
H,0,2.2441192802,1.0277230357,0.8447499662  
C,0,3.0999085034,-1.4784273701,-0.008628865  
H,0,3.1101100685,-0.7274244958,-0.8028014078  
H,0,2.8090954743,-2.4383933322,-0.4344027208  
C,0,0.446226263,2.6642267308,2.248657277  
H,0,1.5312699535,2.784362879,2.2929110084  
C,0,-1.5571823971,3.1755691957,0.7223939277  
H,0,-2.0984393303,2.3650124107,1.2163179872  
H,0,-1.8587091813,4.1035935227,1.2160708032  
C,0,-2.0391363981,3.2552909804,-0.7263226993  
H,0,-3.0731947006,3.5933560271,-0.7690708515  
H,0,-1.4362623794,3.9475537283,-1.3121569832  
N,0,-1.9825765706,1.9559191518,-1.419551625  
C,0,-2.8927599448,0.9878282843,-1.2821972716  
C,0,-0.9731585394,1.5012273642,-2.2480047024  
H,0,-3.7433359138,1.0088641593,-0.623591514  
C,0,-1.3125309986,0.2430909707,-2.6226320816  
H,0,-0.0724803567,2.0614622842,-2.4449248244  
H,0,-0.7925205678,-0.4548646081,-3.2503487322

C, 0, -3.2284530527, -1.3427826902, -2.0671666532  
H, 0, -4.1747200649, -1.1940259423, -1.5512221983  
H, 0, -3.4396037552, -1.5645232887, -3.1144270695  
N, 0, -2.5176988336, -0.0579462968, -2.0153291718  
N, 0, 0.695536172, 0.1529005493, 2.0972486618  
Br, 0, 2.5847355596, 1.7542329071, -1.6463833538  
Br, 0, -3.2107964254, -0.2840773054, 1.744823214  
C, 0, 0.0532325145, 1.2929968582, 2.786817046  
H, 0, -1.0203378457, 1.1113940408, 2.706839096  
H, 0, 0.3305782815, 1.217290578, 3.8389515576  
H, 0, 0.0411514499, 3.3911672889, 2.9577490322  
C, 0, -0.0433549585, 2.9920282845, 0.8349278525  
H, 0, 0.4567751928, 3.9044182673, 0.5030014637  
H, 0, 0.302555903, 2.2255147328, 0.1412116154  
C, 0, 4.4627831694, -1.5718712627, 0.6714705635  
H, 0, 4.7129786925, -0.5953411026, 1.0935914334  
H, 0, 4.4170081755, -2.2789563058, 1.5053820976  
C, 0, 5.5547270088, -1.9938784894, -0.3125891265  
H, 0, 5.2988808075, -2.9671017255, -0.7425919181  
H, 0, 5.5762385232, -1.2854386583, -1.1438609195  
C, 0, 6.9363178797, -2.0702175257, 0.3340060363  
H, 0, 6.9520730178, -2.7904728082, 1.1546358847  
H, 0, 7.6928571407, -2.3749386685, -0.3895162045  
H, 0, 7.2352594164, -1.1009739148, 0.7368739158  
C, 0, -2.4462927116, -2.4717361386, -1.4024965388  
H, 0, -1.4910321318, -2.6108095345, -1.9169019776  
H, 0, -2.2354746628, -2.1726439159, -0.3737802826  
C, 0, -3.234057209, -3.7820632909, -1.4149724599  
H, 0, -3.4850096347, -4.0549371963, -2.4449256997

H,0,-4.1825742031,-3.6306657877,-0.8934699801  
C,0,-2.4732344933,-4.9300005752,-0.7543608144  
H,0,-3.0556450017,-5.851553142,-0.7728409487  
H,0,-1.5282008432,-5.1249356636,-1.2659402984  
H,0,-2.249884033,-4.6986188307,0.2881585168

## MIC6IM+2Tf2N Syn

Charge = 0 Multiplicity = 1

|   |          |          |          |
|---|----------|----------|----------|
| 6 | 1.50404  | -1.56859 | 3.14941  |
| 6 | 1.46977  | -0.23655 | 3.39955  |
| 6 | -0.49104 | -0.82275 | 2.57744  |
| 7 | 0.27222  | -1.91443 | 2.63653  |
| 1 | 2.304    | -2.27881 | 3.2331   |
| 1 | 2.24033  | 0.43109  | 3.73552  |
| 1 | -1.49896 | -0.78678 | 2.19222  |
| 6 | 0.11773  | 0.23685  | -2.6995  |
| 6 | 0.91378  | 1.27706  | -2.34438 |
| 6 | -1.01739 | 2.09215  | -3.03053 |
| 7 | -1.08056 | 0.76571  | -3.13137 |
| 1 | 0.30189  | -0.81977 | -2.64932 |
| 1 | 1.91001  | 1.28547  | -1.93325 |
| 1 | -1.82141 | 2.76983  | -3.24847 |
| 7 | 0.21505  | 0.21115  | 3.04193  |
| 7 | 0.18552  | 2.43114  | -2.56211 |
| 6 | -0.21763 | 1.61718  | 2.9894   |
| 1 | 0.21147  | 2.12248  | 3.85392  |
| 1 | -1.30099 | 1.62632  | 3.08284  |
| 6 | 0.21258  | 2.25772  | 1.6728   |
| 1 | 1.29735  | 2.20282  | 1.58993  |
| 1 | -0.20849 | 1.64806  | 0.87239  |
| 6 | -0.2825  | 3.70013  | 1.50932  |
| 1 | 0.38954  | 4.39286  | 2.02323  |
| 1 | -1.26289 | 3.8069   | 1.97875  |
| 6 | 0.65438  | 3.79868  | -2.27335 |

|    |          |          |          |
|----|----------|----------|----------|
| 1  | 1.58228  | 3.93915  | -2.82588 |
| 1  | -0.08916 | 4.48205  | -2.68199 |
| 6  | 0.87186  | 4.03776  | -0.77874 |
| 1  | 1.54463  | 3.26392  | -0.40912 |
| 1  | 1.41774  | 4.97777  | -0.67522 |
| 6  | -0.43139 | 4.08617  | 0.03217  |
| 1  | -1.16838 | 3.40713  | -0.40203 |
| 1  | -0.86322 | 5.08704  | -0.04407 |
| 6  | -5.34567 | 1.56247  | 0.7674   |
| 6  | -5.21182 | -2.63818 | -0.35429 |
| 8  | -3.56926 | 2.1244   | -1.11287 |
| 8  | -2.73714 | 1.11527  | 1.01254  |
| 8  | -2.69883 | -2.39551 | -1.17813 |
| 8  | -3.20523 | -1.82075 | 1.19768  |
| 9  | -5.03463 | -3.90154 | 0.03827  |
| 9  | -5.64748 | -2.63374 | -1.61377 |
| 9  | -6.1296  | -2.06755 | 0.42552  |
| 9  | -6.34049 | 1.57593  | -0.11879 |
| 9  | -5.23868 | 2.77647  | 1.31652  |
| 9  | -5.62891 | 0.68013  | 1.72662  |
| 7  | -3.98706 | -0.28618 | -0.76263 |
| 6  | 4.46145  | -2.48145 | -1.45325 |
| 7  | 4.0259   | -0.79099 | 0.70818  |
| 8  | 2.93779  | -3.00617 | 0.64246  |
| 8  | 2.13343  | -1.28479 | -0.97936 |
| 9  | 3.88446  | -3.44215 | -2.1813  |
| 9  | 5.53635  | -2.98567 | -0.84799 |
| 9  | 4.84542  | -1.49778 | -2.26968 |
| 16 | 3.22064  | -1.84145 | -0.18329 |

|    |          |          |          |
|----|----------|----------|----------|
| 16 | -3.56551 | -1.73232 | -0.21516 |
| 16 | -3.71621 | 1.1179   | -0.06902 |
| 16 | 4.14568  | 0.7825   | 0.44868  |
| 8  | 3.75051  | 1.26744  | -0.87139 |
| 8  | 3.66603  | 1.52649  | 1.60751  |
| 6  | 6.01666  | 1.00033  | 0.50707  |
| 9  | 6.30065  | 2.29469  | 0.33204  |
| 9  | 6.60329  | 0.29676  | -0.46135 |
| 9  | 6.5028   | 0.60909  | 1.68451  |
| 6  | -0.11932 | -3.25083 | 2.18419  |
| 1  | 0.66692  | -3.63395 | 1.53853  |
| 1  | -0.25564 | -3.90561 | 3.0425   |
| 1  | -1.0495  | -3.16745 | 1.63158  |
| 6  | -2.22291 | 0.00028  | -3.63656 |
| 1  | -3.12003 | 0.60127  | -3.52974 |
| 1  | -2.05571 | -0.25646 | -4.6811  |
| 1  | -2.33514 | -0.90001 | -3.03936 |

## MIC6IM+2Tf2N anti

Charge = 0 Multiplicity = 1

|   |          |          |          |
|---|----------|----------|----------|
| C | 0.19735  | 3.2754   | -1.84108 |
| C | -0.49082 | 2.16466  | -2.20793 |
| C | 1.65312  | 1.79883  | -2.57639 |
| N | 1.53384  | 3.03075  | -2.08393 |
| H | -0.1464  | 4.20207  | -1.42155 |
| H | -1.54403 | 1.94283  | -2.14848 |
| H | 2.57429  | 1.29167  | -2.80298 |
| C | 0.14274  | -0.77806 | 2.63634  |
| C | 0.79259  | -1.77894 | 1.9921   |
| C | -1.32125 | -2.37028 | 2.2225   |
| N | -1.17305 | -1.16612 | 2.77469  |
| H | 0.50991  | 0.17009  | 2.98047  |
| H | 1.81667  | -1.84472 | 1.669    |
| H | -2.25809 | -2.8922  | 2.13022  |
| N | 0.43873  | 1.25542  | -2.67001 |
| N | -0.13891 | -2.76862 | 1.74497  |
| C | 0.15777  | -0.11522 | -3.13408 |
| H | 1.0568   | -0.46549 | -3.636   |
| H | -0.64708 | -0.05078 | -3.86579 |
| C | -0.21443 | -1.04227 | -1.98343 |
| H | 0.59791  | -1.01839 | -1.25627 |
| H | -1.11597 | -0.67195 | -1.49443 |
| C | -0.46579 | -2.47597 | -2.45722 |
| H | 0.40074  | -2.84516 | -3.01465 |
| H | -1.31244 | -2.47923 | -3.14687 |
| C | 0.13841  | -4.02857 | 1.03256  |



|   |          |          |          |
|---|----------|----------|----------|
| H | 0.98078  | -4.49859 | 1.53812  |
| H | -0.73344 | -4.66789 | 1.16432  |
| C | 0.44943  | -3.80246 | -0.44693 |
| H | 1.23509  | -3.04951 | -0.51882 |
| H | 0.89358  | -4.72407 | -0.82797 |
| C | -0.77854 | -3.41986 | -1.28979 |
| H | -1.53891 | -2.93899 | -0.67317 |
| H | -1.24371 | -4.32992 | -1.67327 |
| C | -6.13763 | -1.36636 | -0.50705 |
| C | -5.01206 | 2.78489  | 0.53265  |
| O | -4.33171 | -2.20687 | 1.23817  |
| O | -3.51874 | -1.45468 | -0.99974 |
| O | -2.51134 | 1.98039  | 0.91283  |
| O | -3.53908 | 1.54839  | -1.31721 |
| F | -4.62431 | 3.98104  | 0.07663  |
| F | -5.20977 | 2.87176  | 1.84836  |
| F | -6.15774 | 2.45031  | -0.05857 |
| F | -7.02191 | -1.16306 | 0.46982  |
| F | -6.32313 | -2.58973 | -1.01039 |
| F | -6.34002 | -0.46754 | -1.47018 |
| N | -4.30657 | 0.22507  | 0.79918  |
| C | 5.38786  | 1.08566  | 2.15829  |
| N | 4.13144  | 0.72071  | -0.30701 |
| O | 3.63933  | 2.72457  | 1.04004  |
| O | 2.80105  | 0.5338   | 1.90663  |
| F | 5.23408  | 1.69091  | 3.33778  |
| F | 6.41811  | 1.63995  | 1.51851  |
| F | 5.65012  | -0.2052  | 2.36855  |
| S | 3.79853  | 1.28473  | 1.15926  |

|   |          |          |          |
|---|----------|----------|----------|
| S | -3.66209 | 1.53166  | 0.13641  |
| S | -4.37736 | -1.22937 | 0.15391  |
| S | 3.97086  | -0.78589 | -0.81899 |
| O | 3.55257  | -1.7861  | 0.15492  |
| O | 3.28767  | -0.77368 | -2.1115  |
| C | 5.74286  | -1.24338 | -1.27622 |
| F | 5.74796  | -2.47745 | -1.78586 |
| F | 6.53195  | -1.21572 | -0.20361 |
| F | 6.22208  | -0.39771 | -2.18989 |
| C | 2.64226  | 3.94156  | -1.79203 |
| H | 2.39746  | 4.92984  | -2.17324 |
| H | 2.8219   | 3.96825  | -0.72028 |
| H | 3.53602  | 3.57188  | -2.2849  |
| C | -2.2301  | -0.38097 | 3.41791  |
| H | -3.18015 | -0.88037 | 3.26083  |
| H | -2.01593 | -0.29587 | 4.48137  |
| H | -2.26981 | 0.60128  | 2.95476  |

| BIC4IB+Br2 |             |          |             | BIC5IB+Br2 |             |          |             | MIC6IM+2Tf2N |             |          |             |
|------------|-------------|----------|-------------|------------|-------------|----------|-------------|--------------|-------------|----------|-------------|
| syn        |             | anti     |             | Syn        |             | anti     |             | syn          |             | anti     |             |
| v (cm-1)   | I (Km/mole) | v (cm-1) | I (Km/mole) | v (cm-1)   | I (Km/mole) | v (cm-1) | I (Km/mole) | v (cm-1)     | I (Km/mole) | v (cm-1) | I (Km/mole) |
| 12.153     | 0.492       | 10.205   | 0.007       | -13.786    | 4.003       | 11.024   | 0.047       | 5.287        | 0.341       | 4.268    | 0.417       |
| 15.088     | 1.569       | 12.073   | 0.866       | 11.540     | 1.000       | 16.314   | 1.158       | 11.212       | 0.495       | 10.397   | 0.191       |
| 20.537     | 0.279       | 15.471   | 2.445       | 16.619     | 1.091       | 17.985   | 2.458       | 15.133       | 0.093       | 13.364   | 0.790       |
| 25.751     | 5.773       | 18.488   | 5.240       | 18.988     | 3.561       | 22.167   | 2.095       | 16.901       | 0.261       | 14.957   | 0.085       |
| 31.070     | 1.303       | 20.484   | 4.322       | 23.076     | 1.359       | 33.185   | 0.463       | 21.018       | 2.656       | 16.927   | 1.943       |
| 39.858     | 2.107       | 42.591   | 3.990       | 26.644     | 3.142       | 37.893   | 1.534       | 23.897       | 0.228       | 22.843   | 2.775       |
| 43.021     | 4.920       | 42.815   | 10.014      | 40.485     | 5.121       | 48.786   | 6.330       | 26.743       | 2.013       | 26.025   | 0.260       |
| 48.551     | 6.081       | 45.710   | 0.224       | 42.117     | 8.561       | 50.595   | 4.764       | 29.474       | 0.745       | 30.345   | 1.111       |
| 55.956     | 4.970       | 48.293   | 4.300       | 49.102     | 0.602       | 56.376   | 9.877       | 30.570       | 0.176       | 31.970   | 4.975       |
| 56.509     | 6.009       | 50.141   | 6.584       | 53.703     | 6.435       | 58.157   | 12.871      | 32.151       | 0.978       | 34.128   | 1.185       |
| 71.950     | 9.962       | 66.744   | 0.066       | 68.953     | 22.441      | 61.700   | 3.161       | 35.464       | 2.309       | 35.853   | 0.380       |
| 74.703     | 19.163      | 68.626   | 22.946      | 70.799     | 4.364       | 67.278   | 6.059       | 35.940       | 0.433       | 38.350   | 0.942       |
| 79.454     | 2.692       | 73.039   | 9.378       | 73.455     | 2.282       | 80.287   | 3.850       | 40.657       | 4.097       | 39.457   | 0.323       |
| 85.040     | 8.038       | 75.468   | 1.022       | 74.773     | 2.115       | 82.798   | 13.054      | 43.581       | 1.929       | 42.979   | 0.173       |
| 92.037     | 0.910       | 81.410   | 0.535       | 78.335     | 3.643       | 84.600   | 3.572       | 45.011       | 0.190       | 45.294   | 2.805       |
| 105.630    | 3.636       | 111.854  | 0.219       | 103.599    | 7.445       | 104.465  | 2.799       | 47.326       | 4.387       | 46.931   | 1.219       |
| 114.112    | 3.624       | 113.168  | 0.442       | 109.788    | 4.827       | 114.064  | 11.292      | 51.264       | 1.128       | 50.217   | 3.367       |
| 119.297    | 0.277       | 125.702  | 0.073       | 110.726    | 0.532       | 117.130  | 0.931       | 54.811       | 0.260       | 51.798   | 0.486       |

|         |        |         |         |         |        |         |        |         |        |         |        |
|---------|--------|---------|---------|---------|--------|---------|--------|---------|--------|---------|--------|
| 126.934 | 16.075 | 138.637 | 24.479  | 119.729 | 6.864  | 122.742 | 0.979  | 59.644  | 3.828  | 53.987  | 2.473  |
| 154.699 | 1.206  | 154.577 | 0.041   | 127.890 | 6.702  | 131.789 | 4.338  | 60.599  | 1.815  | 59.655  | 4.975  |
| 174.138 | 0.725  | 160.019 | 1.335   | 157.440 | 0.230  | 157.521 | 1.381  | 62.180  | 2.675  | 62.937  | 5.273  |
| 206.885 | 0.175  | 207.545 | 0.641   | 175.490 | 0.805  | 181.001 | 0.594  | 64.119  | 9.803  | 66.734  | 0.721  |
| 225.582 | 0.592  | 216.244 | 0.018   | 204.577 | 0.639  | 203.311 | 2.542  | 74.112  | 14.367 | 68.532  | 3.599  |
| 238.991 | 0.606  | 239.035 | 0.924   | 213.995 | 0.071  | 228.143 | 1.091  | 83.126  | 5.000  | 78.078  | 7.264  |
| 240.133 | 0.029  | 239.225 | 0.042   | 234.280 | 0.495  | 239.100 | 0.042  | 86.254  | 8.029  | 83.582  | 5.455  |
| 244.779 | 0.021  | 245.066 | 1.834   | 239.829 | 0.212  | 239.930 | 0.227  | 94.820  | 9.546  | 106.252 | 6.396  |
| 256.916 | 1.171  | 265.600 | 0.550   | 244.177 | 0.128  | 245.909 | 0.083  | 116.081 | 0.079  | 110.572 | 5.427  |
| 274.033 | 0.853  | 293.633 | 0.410   | 254.257 | 1.242  | 252.987 | 0.232  | 119.130 | 0.319  | 113.977 | 5.672  |
| 292.188 | 0.431  | 315.234 | 0.061   | 274.578 | 0.292  | 267.943 | 1.221  | 120.996 | 0.342  | 117.720 | 10.011 |
| 318.549 | 0.227  | 316.317 | 0.249   | 298.332 | 0.577  | 296.090 | 0.861  | 127.762 | 0.648  | 123.628 | 0.363  |
| 322.943 | 0.676  | 317.557 | 0.006   | 314.332 | 0.384  | 309.727 | 0.477  | 141.045 | 0.041  | 133.239 | 1.317  |
| 382.767 | 1.657  | 396.386 | 0.085   | 318.246 | 0.258  | 316.007 | 0.166  | 149.805 | 1.841  | 147.368 | 1.330  |
| 401.156 | 0.146  | 407.893 | 0.252   | 351.113 | 0.211  | 358.407 | 0.377  | 156.799 | 1.167  | 158.049 | 1.331  |
| 412.227 | 0.270  | 413.888 | 2.503   | 388.633 | 1.249  | 383.821 | 3.078  | 161.970 | 0.410  | 159.033 | 1.320  |
| 431.980 | 2.243  | 432.569 | 0.105   | 410.785 | 1.471  | 402.005 | 2.554  | 180.258 | 0.088  | 174.369 | 0.096  |
| 463.652 | 0.503  | 436.370 | 3.899   | 427.471 | 0.803  | 429.573 | 1.221  | 182.644 | 0.584  | 189.247 | 1.946  |
| 526.992 | 0.707  | 519.685 | 0.043   | 434.529 | 2.040  | 444.738 | 0.770  | 185.828 | 2.647  | 192.837 | 0.126  |
| 612.935 | 11.730 | 614.665 | 0.102   | 477.130 | 0.733  | 471.583 | 0.861  | 194.849 | 1.640  | 195.805 | 0.452  |
| 621.189 | 1.827  | 621.117 | 14.750  | 521.599 | 0.583  | 518.050 | 0.277  | 195.618 | 0.818  | 197.021 | 1.731  |
| 641.768 | 71.054 | 637.362 | 0.917   | 619.836 | 0.811  | 618.338 | 19.992 | 205.287 | 0.266  | 199.708 | 0.776  |
| 649.037 | 5.822  | 639.831 | 116.456 | 624.356 | 31.865 | 623.236 | 2.409  | 205.682 | 1.201  | 205.693 | 1.520  |
| 661.803 | 19.335 | 659.343 | 2.809   | 641.406 | 33.559 | 636.982 | 36.570 | 209.312 | 0.914  | 206.899 | 0.367  |

|         |       |         |       |         |        |         |        |         |       |         |       |
|---------|-------|---------|-------|---------|--------|---------|--------|---------|-------|---------|-------|
| 662.895 | 6.504 | 659.741 | 2.554 | 644.925 | 10.969 | 651.099 | 50.158 | 225.481 | 1.052 | 224.973 | 0.066 |
|         |       |         |       | 651.831 | 29.951 | 652.333 | 0.755  | 249.907 | 2.696 | 250.832 | 1.840 |
|         |       |         |       | 662.113 | 12.473 | 656.046 | 2.248  | 255.596 | 0.626 | 260.572 | 2.364 |
|         |       |         |       |         |        |         |        | 262.793 | 0.999 | 261.215 | 0.477 |
|         |       |         |       |         |        |         |        | 263.078 | 1.054 | 263.741 | 0.974 |
|         |       |         |       |         |        |         |        | 268.214 | 3.122 | 267.820 | 2.600 |
|         |       |         |       |         |        |         |        | 268.744 | 3.105 | 268.683 | 2.029 |
|         |       |         |       |         |        |         |        | 278.476 | 0.238 | 269.331 | 1.040 |
|         |       |         |       |         |        |         |        | 290.408 | 0.410 | 289.679 | 0.336 |
|         |       |         |       |         |        |         |        | 291.013 | 1.019 | 290.867 | 0.527 |
|         |       |         |       |         |        |         |        | 294.464 | 1.405 | 294.378 | 0.854 |
|         |       |         |       |         |        |         |        | 294.814 | 0.192 | 295.428 | 0.255 |
|         |       |         |       |         |        |         |        | 307.509 | 1.886 | 306.672 | 2.244 |
|         |       |         |       |         |        |         |        | 307.649 | 2.337 | 308.756 | 2.669 |
|         |       |         |       |         |        |         |        | 318.113 | 0.441 | 315.658 | 0.338 |
|         |       |         |       |         |        |         |        | 319.038 | 0.905 | 320.170 | 1.170 |
|         |       |         |       |         |        |         |        | 334.740 | 0.333 | 334.497 | 0.700 |
|         |       |         |       |         |        |         |        | 335.406 | 1.013 | 337.111 | 1.103 |
|         |       |         |       |         |        |         |        | 355.222 | 0.625 | 354.157 | 1.070 |
|         |       |         |       |         |        |         |        | 390.106 | 4.591 | 389.193 | 3.907 |
|         |       |         |       |         |        |         |        | 392.658 | 4.347 | 392.947 | 6.821 |

|  |  |  |  |  |  |  |  |         |        |         |        |
|--|--|--|--|--|--|--|--|---------|--------|---------|--------|
|  |  |  |  |  |  |  |  | 409.906 | 0.373  | 399.150 | 0.322  |
|  |  |  |  |  |  |  |  | 413.925 | 5.391  | 409.287 | 6.497  |
|  |  |  |  |  |  |  |  | 416.028 | 5.634  | 418.652 | 6.194  |
|  |  |  |  |  |  |  |  | 420.001 | 1.883  | 421.476 | 0.120  |
|  |  |  |  |  |  |  |  | 439.927 | 0.196  | 438.196 | 0.408  |
|  |  |  |  |  |  |  |  | 497.900 | 6.928  | 498.244 | 64.460 |
|  |  |  |  |  |  |  |  | 499.673 | 33.834 | 500.937 | 78.607 |
|  |  |  |  |  |  |  |  | 520.356 | 14.984 | 517.585 | 1.132  |
|  |  |  |  |  |  |  |  | 521.996 | 15.353 | 521.635 | 24.536 |
|  |  |  |  |  |  |  |  | 525.542 | 0.934  | 522.033 | 5.563  |
|  |  |  |  |  |  |  |  | 539.479 | 6.235  | 538.974 | 5.256  |
|  |  |  |  |  |  |  |  | 539.608 | 3.981  | 540.973 | 3.604  |
|  |  |  |  |  |  |  |  | 549.939 | 2.059  | 549.841 | 1.755  |
|  |  |  |  |  |  |  |  | 550.024 | 2.336  | 550.061 | 1.400  |
|  |  |  |  |  |  |  |  | 560.239 | 6.566  | 560.533 | 10.259 |
|  |  |  |  |  |  |  |  | 561.468 | 46.271 | 561.023 | 52.901 |
|  |  |  |  |  |  |  |  | 563.204 | 4.209  | 562.136 | 51.740 |
|  |  |  |  |  |  |  |  | 563.862 | 20.792 | 567.647 | 69.587 |
|  |  |  |  |  |  |  |  | 581.923 | 31.416 | 582.353 | 34.773 |
|  |  |  |  |  |  |  |  | 582.701 | 44.039 | 582.979 | 63.561 |
|  |  |  |  |  |  |  |  | 601.038 | 1.158  | 599.045 | 0.543  |

|  |  |  |  |  |  |  |  |         |        |         |        |
|--|--|--|--|--|--|--|--|---------|--------|---------|--------|
|  |  |  |  |  |  |  |  | 631.742 | 5.689  | 629.368 | 53.984 |
|  |  |  |  |  |  |  |  | 633.796 | 1.473  | 633.399 | 3.050  |
|  |  |  |  |  |  |  |  | 636.830 | 68.284 | 639.143 | 16.818 |
|  |  |  |  |  |  |  |  | 640.422 | 22.570 | 643.352 | 24.356 |
|  |  |  |  |  |  |  |  | 644.440 | 11.940 | 644.312 | 14.676 |
|  |  |  |  |  |  |  |  | 664.181 | 13.961 | 667.685 | 28.309 |
|  |  |  |  |  |  |  |  | 674.158 | 23.622 | 672.947 | 6.183  |
|  |  |  |  |  |  |  |  | 697.069 | 2.924  | 696.726 | 2.919  |
